# Supplementary material for: Optical coherence tomography angiography of superficial retinal vessel density and foveal avascular zone in myopic children
Source: PLoS One. 2019 Jul 18;14(7):e0219785. doi: 10.1371/journal.pone.0219785 (PMC6639003; doi:10.1371/journal.pone.0219785)
Supplement: S1 File — (XLSX) [file pone.0219785.s001.xlsx]

## Sheet: Sheet1
no	group	gr	eye	sex	age	al	re	ilmiplthickness	shilmipl	ihilmipl	wsvd	fsvd	psvd	ft	pft	faz	index	fazcorr	wsvdcorr
1	Myopia (+)	Myopia (+)	P	Girls	14	24.11	0.25	114	114	114	52.32	24.04	54.59	231	309	0.403	74	0.408403	53.7054
2	Myopia (+)	Myopia (+)	L	Girls	14	24.47	1.25	114	113	114	52.13	26.35	53.98	235	313	0.403	72	0.42069	55.2528
3	Myopia (+)	Myopia (+)	P	Boys	10	23.31	1.75	119	119	119	53.79	34.78	56.05	246	305	0.173	69	0.163878	51.3221
4	Myopia (+)	Myopia (+)	L	Boys	10	23.14	1	116	117	115	53.34	35.7	55.73	249	310	0.167	65	0.155895	50.0908
5	Myopia (+)	Myopia (+)	L	Boys	17	27.19	6	131	128	133	50.13	36.83	52.07	275	324	0.175	60	0.225551	66.6606
6	Myopia (+)	Myopia (+)	P	Boys	11	24	1.5	112	111	113	51.19	29.27	53.56	219	298	0.296	71	0.297237	52.0282
7	Myopia (+)	Myopia (+)	L	Boys	11	23.67	1	109	107	111	49.85	28.52	52	215	291	0.288	70	0.281305	49.1698
8	Myopia (+)	Myopia (+)	P	Boys	15	26.69	4.75	113	114	112	50.74	24.24	53.78	230	304	0.394	68	0.489308	64.8384
9	Myopia (+)	Myopia (+)	L	Boys	15	25.57	6.75	113	114	112	49.19	24.97	52.35	226	301	0.394	61	0.449104	57.3237
10	Myopia (+)	Myopia (+)	P	Girls	12	23.6	2	108	109	107	49.67	23.87	53	226	300	0.354	69	0.343729	48.6788
11	Myopia (+)	Myopia (+)	L	Girls	12	23.39	2	107	107	108	47.86	24.06	50.18	223	294	0.346	73	0.330009	46.0048
12	Myopia (+)	Myopia (+)	P	Girls	13	23.78	2.75	125	126	124	53.57	32.46	56.35	269	331	0.27	58	0.266181	53.3724
13	Myopia (+)	Myopia (+)	L	Girls	13	24.09	3.25	125	126	125	52.3	30.45	59.91	271	328	0.3	65	0.303518	53.5886
14	Myopia (+)	Myopia (+)	P	Girls	15	23.52	3	113	115	112	44.52	29.47	45.15	236	310	0.259	63	0.249783	43.3117
15	Myopia (+)	Myopia (+)	L	Girls	15	23.59	3.25	113	114	112	51.61	28.81	53.9	223	300	0.293	73	0.284258	50.5337
16	Myopia (+)	Myopia (+)	P	Girls	12	22.81	2.25	113	113	113	43.87	24.28	45.51	248	328	0.433	45	0.39276	39.9322
17	Myopia (+)	Myopia (+)	L	Girls	12	23.26	3	110	110	110	42.95	23.77	45.84	243	310	0.374	63	0.352761	40.789
18	Myopia (+)	Myopia (+)	P	Girls	14	24.38	3	115	116	115	54.35	36.56	56.54	273	318	0.197	75	0.204137	57.1489
19	Myopia (+)	Myopia (+)	L	Girls	14	24.24	1.75	116	115	117	50.79	35.79	52.37	274	327	0.198	59	0.202824	52.7448
20	Myopia (+)	Myopia (+)	P	Girls	12	27.48	10.25	118	116	121	48.11	41.29	48.16	292	293	0.078	58	0.102687	65.4454
21	Myopia (+)	Myopia (+)	L	Girls	15	24.04	6.75	114	114	113	51.51	39.83	52.96	228	291	0.271	71	0.273041	52.5424
22	Myopia (+)	Myopia (+)	P	Girls	17	24.94	4.75	105	106	104	53.95	29.74	56.7	235	290	0.301	67	0.326399	59.5796
23	Myopia (+)	Myopia (+)	L	Girls	17	25.07	4.75	106	106	105	51.76	30.18	54.74	231	289	0.322	63	0.35282	57.8057
24	Myopia (+)	Myopia (+)	P	Boys	16	26.8	5.5	125	125	125	45.51	28.89	48.48	273	330	0.45	50	0.56347	58.6708
25	Myopia (+)	Myopia (+)	P	Boys	16	24.63	7	128	127	128	43.84	27.13	45.39	278	334	0.267	62	0.282377	47.125
26	Myopia (+)	Myopia (+)	L	Boys	16	25.68	8.5	127	127	127	42.38	28.91	44.13	274	322	0.264	65	0.303517	49.8462
27	Myopia (+)	Myopia (+)	P	Girls	17	25.19	6	129	129	129	53.24	28.26	56.3	235	326	0.271	74	0.299788	60.0739
28	Myopia (+)	Myopia (+)	P	Girls	14	25.02	5	82	82	82	43.74	23.45	46.27	221	253	0.37	68	0.403799	48.639
29	Myopia (+)	Myopia (+)	L	Girls	14	24.27	3.25	81	82	80	44.52	23.31	46.5	220	254	0.45	71	0.462105	46.3573
30	Myopia (+)	Myopia (+)	P	Girls	16	24.98	3	124	125	124	52.82	42.16	54.72	267	300	0.027	72	0.0293723	58.5337
31	Myopia (+)	Myopia (+)	L	Girls	16	24.68	2.75	124	122	125	52.63	39.46	54.31	271	298	0.034	75	0.0361042	56.8219
32	Myopia (+)	Myopia (+)	P	Boys	11	22.04	1.75	126	123	128	55.43	31.58	57.56	250	320	0.249	68	0.210868	46.8207
33	Myopia (+)	Myopia (+)	P	Girls	17	25.42	5.75	117	116	119	45.15	29.58	46.78	279	327	0.177	56	0.199395	51.9532
34	Myopia (+)	Myopia (+)	L	Girls	17	25.29	5.5	116	116	116	41.28	29.92	42.45	272	317	0.178	59	0.198475	46.9782
35	Myopia (+)	Myopia (+)	P	Boys	11	24.85	2.25	114	114	115	52.88	35.46	54.78	259	305	0.133	64	0.143184	57.9442
36	Myopia (+)	Myopia (+)	L	Boys	11	24.76	2	115	115	115	51.16	40.53	53.22	257	309	0.131	56	0.140011	55.6221
37	Myopia (+)	Myopia (+)	P	Girls	11	24.07	1.5	111	110	111	50.6	29	52.86	261	319	0.224	55	0.22625	51.7536
38	Myopia (+)	Myopia (+)	L	Girls	11	24.6	1.25	111	112	111	50.09	31.79	51.47	260	319	0.226	55	0.238434	53.7018
39	Myopia (+)	Myopia (+)	P	Girls	12	23.37	1.5	121	117	124	53.95	33.77	56.01	254	313	0.269	70	0.256129	51.7626
40	Myopia (+)	Myopia (+)	L	Girls	12	23.77	2.5	121	120	122	48.16	29.1	50.31	259	319	0.251	57	0.247241	47.9387
41	Myopia (+)	Myopia (+)	P	Girls	12	24.3	1.25	112	110	115	50.28	29.21	52.83	239	296	0.253	57	0.260449	52.495
42	Myopia (+)	Myopia (+)	L	Girls	12	23.19	0.75	113	111	116	60.25	40.67	62.08	225	281	0.22	75	0.206259	56.8455
43	Myopia (+)	Myopia (+)	P	Girls	9	24.54	4.5	111	109	112	52.37	27.34	54.25	230	299	0.361	53	0.379005	55.8508
44	Myopia (+)	Myopia (+)	P	Girls	16	26.99	7.25	116	116	116	50.1	38.06	50.83	269	309	0.181	71	0.229865	65.5744
45	Myopia (+)	Myopia (+)	L	Girls	16	27.31	7	114	115	113	51.39	36.14	53.16	273	321	0.212	58	0.275656	68.984
46	Myopia (+)	Myopia (+)	P	Boys	14	24.71	1.5	118	118	118	51.06	32	53.43	255	319	0.305	69	0.324664	55.2717
47	Myopia (+)	Myopia (+)	L	Boys	14	24.47	0.75	118	119	117	53.32	29.51	56.23	251	314	0.269	61	0.280808	56.5141
48	Myopia (+)	Myopia (+)	P	Girls	10	23.31	0.5	119	117	121	47.4	28.38	50.33	265	328	0.24	49	0.227345	45.2253
49	Myopia (+)	Myopia (+)	L	Girls	10	23.84	2	116	113	118	51.8	30.85	54.09	265	323	0.264	63	0.261581	51.8913
50	Myopia (+)	Myopia (+)	P	Boys	12	23.67	2.5	128	128	128	55.88	44.09	57.89	273	328	0.126	57	0.123071	55.1175
51	Myopia (+)	Myopia (+)	L	Boys	12	24.26	2.25	125	126	124	53.6	41.63	54.87	281	324	0.079	57	0.0810583	55.7623
52	Myopia (+)	Myopia (+)	P	Girls	15	24.09	2	115	115	116	53.24	30.83	56.02	256	324	0.254	70	0.256978	54.5518
53	Myopia (+)	Myopia (+)	L	Girls	15	24.49	2.5	118	116	121	50.37	31.07	53.47	263	331	0.247	64	0.258264	53.4817
54	Myopia (+)	Myopia (+)	L	Girls	12	22.43	0.5	118	118	118	50.99	30.51	53.48	251	326	0.272	61	0.23857	44.7478
55	Myopia (+)	Myopia (+)	P	Girls	14	23.93	2.5	118	119	118	49.52	22.86	52.63	246	320	0.361	56	0.360397	50.0136
56	Myopia (+)	Myopia (+)	L	Girls	14	24.02	3.5	117	117	118	49.72	24.54	52.09	228	300	0.374	70	0.376189	50.6253
57	Myopia (+)	Myopia (+)	P	Girls	15	24.91	8	120	120	121	51.41	30.24	53.46	258	313	0.257	62	0.278016	56.6273
58	Myopia (+)	Myopia (+)	L	Girls	15	24.9	7.5	120	119	121	48.92	30.73	51.17	263	323	0.248	57	0.268065	53.8379
59	Myopia (+)	Myopia (+)	P	Boys	12	24.02	2.75	133	136	131	49.08	30.56	51.14	265	345	0.271	50	0.272586	49.9736
60	Myopia (+)	Myopia (+)	L	Boys	12	23.56	1.75	137	138	135	51.23	29.64	53.63	249	325	0.262	70	0.253537	50.0235
61	Myopia (+)	Myopia (+)	P	Boys	11	24.14	5.75	117	119	116	53.89	35.15	56.5	270	311	0.19	75	0.193027	55.466
62	Myopia (+)	Myopia (+)	L	Boys	11	24.29	6	116	117	115	53.45	35.61	55.96	275	314	0.203	75	0.208805	55.755
63	Myopia (+)	Myopia (+)	P	Girls	10	23.84	0.75	122	121	124	50.92	35.42	52.38	249	319	0.241	61	0.238791	51.0098
64	Myopia (+)	Myopia (+)	L	Girls	10	23.84	1.25	124	121	127	53.11	31.7	55.3	248	317	0.258	68	0.255635	53.2036
65	Myopia (+)	Myopia (+)	P	Boys	14	23.73	0.75	126	125	127	53.87	37.6	55.45	282	327	0.131	70	0.128604	53.4272
66	Myopia (+)	Myopia (+)	P	Girls	15	28.36	11.75	115	109	120	53.37	37.33	54.86	248	301	0.13	71	0.182282	77.6657
67	Myopia (+)	Myopia (+)	P	Boys	12	25.35	3.75	119	119	119	51.57	33.54	53.92	267	310	0.181	62	0.202779	58.989
68	Myopia (+)	Myopia (+)	P	Girls	17	24.54	7.75	116	113	118	53.05	36.41	55.34	272	300	0.177	57	0.185828	56.576
69	Myopia (+)	Myopia (+)	L	Girls	17	24.53	6	116	113	118	52.75	38.11	55.52	272	300	0.164	61	0.172039	56.2066
70	Myopia (+)	Myopia (+)	P	Girls	14	23.52	0.75	126	127	126	52.76	30.61	55.31	244	308	0.189	77	0.182274	51.328
71	Myopia (+)	Myopia (+)	L	Girls	14	24	0.75	124	125	123	47.79	27.98	50.3	245	309	0.219	68	0.219915	48.5725
72	Myopia (+)	Myopia (+)	P	Girls	15	23.29	3	120	120	120	53.71	30.28	56.32	239	296	0.297	79	0.280856	51.1505
73	Myopia (+)	Myopia (+)	L	Girls	15	23.43	3	118	120	117	49.52	30.02	51	237	293	0.304	70	0.290942	47.7772
74	Myopia (+)	Myopia (+)	P	Girls	12	26.63	6.25	120	117	122	46.69	28.44	48.71	277	329	0.267	53	0.330098	59.3756
75	Myopia (+)	Myopia (+)	L	Girls	12	26.38	6	121	120	122	49.62	32.51	51.38	272	329	0.266	63	0.322716	61.8363
76	Myopia (+)	Myopia (+)	P	Girls	15	25.02	5	82	82	82	43.74	23.45	46.27	221	253	0.37	68	0.403799	48.639
77	Myopia (+)	Myopia (+)	L	Girls	15	24.27	3.25	81	82	80	44.52	23.31	46.5	220	254	0.45	71	0.462105	46.3573
78	Myopia (+)	Myopia (+)	P	Boys	15	24.48	1	124	126	121	51.72	32.85	53.97	275	331	0.219	75	0.2288	54.8667
79	Myopia (+)	Myopia (+)	L	Boys	15	24.21	1.25	123	125	121	50.64	34.22	52.52	269	327	0.203	73	0.207431	52.4484
80	Myopia (+)	Myopia (+)	L	Girls	10	23.66	1	124	122	127	53.29	32.82	55.57	250	317	0.247	59	0.241055	52.5148
81	Myopia (+)	Myopia (+)	P	Girls	15	26.54	7.75	111	110	111	49.14	28.02	51.86	247	295	0.295	60	0.362254	62.0387
82	Myopia (+)	Myopia (+)	L	Girls	15	26.49	7.25	111	112	109	50.06	32.57	52.88	249	294	0.26	56	0.318073	62.9447
83	Myopia (+)	Myopia (+)	P	Girls	13	24.07	1.5	111	110	111	50.6	29.07	52.86	261	319	0.224	55	0.22625	51.7536
84	Myopia (+)	Myopia (+)	L	Girls	13	24.6	1.25	111	112	111	50.09	31.79	51.47	260	319	0.226	55	0.238434	53.7018
85	Myopia (+)	Myopia (+)	P	Girls	14	23.74	1.75	123	122	125	54.06	32.98	56.77	265	328	0.252	63	0.2476	53.6645
86	Myopia (+)	Myopia (+)	L	Girls	14	23.95	2	122	122	122	52.39	32.59	55.22	263	327	0.211	70	0.211	53.008
87	Myopia (+)	Myopia (+)	P	Boys	15	23.92	2.5	142	145	138	52	28.73	54.43	263	356	0.296	62	0.295259	52.4709
88	Myopia (+)	Myopia (+)	L	Boys	15	23.93	2.5	141	140	141	47.87	26.62	50.15	262	354	0.287	56	0.286521	48.3472
89	Myopia (+)	Myopia (+)	L	Boys	17	23.94	2.25	119	118	120	56.13	36.91	57.91	271	312	0.172	75	0.171856	56.7408
90	Myopia (+)	Myopia (+)	P	Girls	12	26.02	6.75	118	118	118	48.76	26.08	50.71	252	310	0.361	63	0.426099	58.9963
91	Myopia (+)	Myopia (+)	L	Girls	12	26.33	7.75	120	119	121	47.71	28.12	49.46	254	306	0.287	65	0.346875	59.2143
92	Myopia (+)	Myopia (+)	P	Boys	16	24.42	1.75	120	120	121	52.51	30.18	55.45	268	325	0.249	62	0.258869	55.4101
93	Myopia (+)	Myopia (+)	L	Boys	16	24.15	1.75	120	118	123	52.25	32.16	54.79	262	317	0.284	68	0.288763	53.8262
94	Myopia (+)	Myopia (+)	P	Girls	17	25.42	5.75	118	117	119	53.23	35.8	55.34	279	327	0.179	62	0.201648	61.2507
97	Myopia (+)	Myopia (+)	P	Girls	17	25.19	6	128	127	129	47.39	22.62	50.48	242	325	0.303	67	0.335188	53.473
98	Myopia (+)	Myopia (+)	P	Boys	17	24.41	2.5	116	114	118	50.74	35.9	52.84	263	304	0.129	70	0.134003	53.495
99	Myopia (+)	Myopia (+)	L	Girls	14	28.48	12	109	106	111	46.74	36.03	49.13	237	281	0.149	55	0.210695	68.634
100	Myopia (+)	Myopia (+)	P	Girls	14	27.54	10	107	106	108	46.48	32.21	48.79	229	280	0.214	61	0.282964	63.5241
101	Myopia (+)	Myopia (+)	L	Boys	16	23.42	1.5	121	123	118	55.41	40.48	56.81	253	306	0.131	72	0.125266	53.4104
102	Myopia (+)	Myopia (+)	P	Boys	14	24.67	1	117	114	119	52.46	31.35	54.89	248	304	0.258	69	0.273745	56.5889
103	Myopia (+)	Myopia (+)	L	Boys	14	24	0.75	114	113	115	52.58	33.93	54.8	259	305	0.174	67	0.174727	53.4409
104	Myopia (+)	Myopia (+)	L	Boys	12	25.57	3.25	119	118	121	52.76	35.07	54.37	252	310	0.22	76	0.250769	61.484
105	Myopia (+)	Myopia (+)	P	Girls	15	24.37	4	122	121	123	53.02	32.66	55.24	255	323	0.228	72	0.236067	55.701
106	Myopia (+)	Myopia (+)	L	Girls		24.06	2.25	128	127	129	53.74	21.24	57.03	229	319	0.447	72	0.451115	54.9158
107	Myopia (+)	Myopia (+)	P	Boys	13	23.7	1.75	131	130	132	53.94	27.54	57.26	261	333	0.291	65	0.284957	53.3502
108	Myopia (+)	Myopia (+)	L	Boys	13	23.74	1.75	127	124	130	52.16	27.49	55.72	252	323	0.304	69	0.298692	51.7784
109	Myopia (+)	Myopia (+)	P	Girls	17	25.08	5.25	120	120	120	49.07	26.5	51.73	242	304	0.336	68	0.368454	54.8486
110	Myopia (+)	Myopia (+)	L	Girls	17	25	5.75	122	124	121	47.02	29.62	48.92	258	313	0.299	58	0.325792	52.1963
111	Myopia (+)	Myopia (+)	P	Boys	17	26.4	6.25	107	106	108	47.89	26.43	49.76	208	286	0.307	63	0.373023	59.7777
112	Myopia (+)	Myopia (+)	L	Boys	17	26.41	6.5	107	107	108	43.06	29.28	44.57	224	292	0.312	51	0.379385	53.7925
113	Myopia (+)	Myopia (+)	L	Boys				120	119	121	53.2	29.04	56.11	236	319	0.25	65
114	Myopia (+)	Myopia (+)	P	Girls	14	23.49		120	121	119	53.45	32.38	54.79	248	322	0.301	59	0.289549	51.8556
115	Myopia (+)	Myopia (+)	L	Girls	14	23.27		122	120	123	52.4	30.31	55.09	238	305	0.296	75	0.27943	49.81
116	Myopia (+)	Myopia (+)	P	Girls	16	24.64	1.25	127	125	128	51.78	27.2	54.8	245	330	0.302	68	0.319652	55.7088
117	Myopia (+)	Myopia (+)	L	Girls	16	24.91	1.5	126	127	125	53.53	31.66	55.64	246	329	0.275	71	0.297488	58.9624
118	Myopia (+)	Myopia (+)	L	Boys	13	24.09		133	131	135	51.13	31.44	54.16	236	322	0.284	68	0.28733	52.3898
119	Myopia (+)	Myopia (+)	P	Boys	14	26.65	3.25	113	113	113	50.39	32.09	53.41	249	303	0.182	65	0.225349	64.1842
120	Myopia (+)	Myopia (+)	L	Boys	14	26.4	3.25	114	113	115	53.15	37.28	55.33	238	296	0.203	75	0.246657	66.3433
121	Myopia (+)	Myopia (+)	P	Girls	10	24.16	3.25	121	120	121	52.13	33.5	54.3	249	302	0.166	69	0.168924	53.7507
122	Myopia (+)	Myopia (+)	L	Girls	10	24.17	3.25	121	120	121	49.97	34.66	52.19	253	309	0.176	58	0.179248	51.5697
123	Myopia (+)	Myopia (+)	P	Girls	15	25.16	3.75	125	125	125	46.39	30.06	48.05	270	315	0.234	61	0.258242	52.2103
124	Myopia (+)	Myopia (+)	P	Boys	13	23.7	1.25	112	109	115	51.42	24.14	53.66	221	314	0.314	73	0.307479	50.8577
125	Myopia (+)	Myopia (+)	L	Boys	13	23.2	0.25	113	112	114	48.12	28.79	49.67	240	318	0.16	66	0.150136	45.4435
126	Myopia (+)	Myopia (+)	P	Boys	12	24.68	0.75	117	116	118	48.27	29.64	51.27	254	313	0.263	55	0.279277	52.1147
127	Myopia (+)	Myopia (+)	L	Boys	12	23.82	0.75	114	114	114	50.73	32.82	52.16	250	306	0.248	62	0.245315	50.7272
128	Myopia (+)	Myopia (+)	P	Boys	9	24.29	2.25	116	117	114	48.8	19.75	51.43	204	300	0.441	65	0.45361	50.9045
129	Myopia (+)	Myopia (+)	L	Boys	9	23.59	2	120	121	118	51.77	25.94	54.41	222	315	0.366	60	0.35508	50.6904
130	Myopia (+)	Myopia (+)	P	Boys	14	24.3	0.75	127	128	126	55.84	37.87	57.92	262	333	0.211	69	0.217212	58.3
131	Myopia (+)	Myopia (+)	L	Boys	14	24.52	2	128	127	129	53.96	34.53	55.67	250	316	0.234	76	0.245271	57.4452
132	Myopia (+)	Myopia (+)	P	Girls	11	23.59	0.75	129	130	128	54.09	35.8	56.11	254	316	0.123	70	0.11933	52.962
133	Myopia (+)	Myopia (+)	L	Girls	11	24.76	3	125	127	122	54.83	35.21	56.59	241	296	0.181	74	0.19345	59.6122
134	Myopia (+)	Myopia (+)	P	Boys	14	24.37	2	130	129	131	48.42	30.66	50.77	265	312	0.172	65	0.178085	50.8684
135	Myopia (+)	Myopia (+)	L	Boys	14	24.04	1.5	130	130	130	51.83	39.43	53.28	264	314	0.137	66	0.138032	52.8688
136	Myopia (+)	Myopia (+)	P	Boys	11	22.04	1.75	126	123	128	55.43	31.58	57.56	250	320	0.249	68	0.210868	46.8207
137	Myopia (+)	Myopia (+)	P	Girls	12	24.14	5.5	117	119	116	53.89	35.15	56.5	270	311	0.19	75	0.193027	55.466
138	Myopia (+)	Myopia (+)	L	Girls	12	24.29	6	116	117	115	53.45	35.61	55.96	275	314	0.201	75	0.206747	55.755
139	Myopia (+)	Myopia (+)	L	Boys	17	23.98	0.75	122	123	121	48.31	29.33	50.67	267	313	0.204	67	0.204511	49.0125
140	Myopia (+)	Myopia (+)	P	Girls	17	24.87	5.75	116	116	117	55.38	27.45	58.54	227	295	0.341	76	0.367701	60.789
141	Myopia (+)	Myopia (+)	L	Girls	17	24.43	6	116	115	116	50.15	27.46	53.44	226	295	0.333	65	0.346482	52.9666
142	Myopia (+)	Myopia (+)	P	Boys	17	26.26	5	120	119	122	54.69	32.22	57.63	245	316	0.271	73	0.325797	67.4902
143	Myopia (+)	Myopia (+)	L	Boys	17	26.75	5	119	117	120	51.09	30.78	53.45	247	320	0.283	61	0.353039	65.6011
144	Myopia (+)	Myopia (+)	P	Girls	13	27.02	5.25	118	118	117	54.11	35.77	56.54	259	293	0.15	61	0.19092	70.9919
145	Myopia (+)	Myopia (+)	L	Girls	13	26.94	4.5	119	117	122	52.53	32.52	55.89	271	304	0.163	58	0.206239	68.4821
146	Myopia (+)	Myopia (+)	P	Boys	14	25.01	2.25	121	119	124	51.97	32.21	54.29	271	330	0.247	68	0.269348	57.741
147	Myopia (+)	Myopia (+)	L	Boys	14	25.27	2.25	120	118	121	48.19	27.35	49.82	271	334	0.247	59	0.274977	54.7486
148	Myopia (+)	Myopia (+)	P	Girls	17	24	3.75	116	115	116	49.14	36.05	50.94	275	306	0.207	64	0.207865	49.9446
149	Myopia (+)	Myopia (+)	L	Girls	17	25.68	7.25	113	112	114	41.41	32.87	41.94	282	309	0.163	44	0.187399	48.7053
150	Myopia (+)	Myopia (+)	P	Boys	17	24.75	3	128	130	126	50.5	39.6	51.34	280	331	0.115	57	0.122811	54.8567
151	Myopia (+)	Myopia (+)	L	Boys	17	24.92	2.75	127	128	127	48.85	39.51	49.74	268	317	0.114	67	0.123421	53.8541
152	Myopia (+)	Myopia (+)	P	Girls	16	25.03	5.5	119	120	119	51.91	31.79	54.19	252	315	0.285	62	0.311283	57.7739
153	Myopia (+)	Myopia (+)	L	Girls	16	24.72	5.5	115	116	114	52.51	29.63	55.27	241	296	0.302	69	0.321731	56.891
154	Myopia (+)	Myopia (+)	P	Boys	13	28.08		104	103	104	50.87	40.12	52.29	251	279	0.137	59	0.188323	72.4739
155	Myopia (+)	Myopia (+)	P	Girls	15	24.3	4	122	121	123	50.18	29.21	52.24	255	323	0.243	71	0.250154	52.3906
156	Myopia (+)	Myopia (+)	L	Girls	15	24.37	4.25	123	122	124	49.64	30.85	52.52	254	320	0.259	72	0.268164	52.1501
157	Myopia (+)	Myopia (+)	L	Girls	16	22.75	0.5	126	124	128	52.47	21.89	55.53	226	334	0.458	64	0.413254	47.4876
158	Myopia (+)	Myopia (+)	P	Girls	17	24.04	4	115	114	117	52.71	22.52	55.76	210	302	0.385	75	0.387899	53.7665
159	Myopia (+)	Myopia (+)	L	Girls	17	23.04	3.75	114	115	112	50.04	22.23	52.69	215	308	0.439	67	0.406273	46.552
160	Myopia (+)	Myopia (+)	P	Boys	17	25.52	2.5	126	125	127	50.96	33.1	54.89	259	319	0.263	58	0.298611	59.1366
161	Myopia (+)	Myopia (+)	L	Boys	17	25.11	2.5	126	127	126	52.22	37.38	54.18	268	321	0.232	61	0.255018	58.5202
162	Myopia (+)	Myopia (+)	P	Girls	10	22.78	2.75	107	109	105	51.34	31.22	53.41	206	290	0.277	59	0.250597	46.5982
163	Myopia (+)	Myopia (+)	P	Girls	15	24.04	2	115	115	116	53.24	30.83	55.79	236	324	0.254	70	0.255913	54.3071
164	Myopia (+)	Myopia (+)	P	Boys	17	26.99	7.25	116	116	116	50.1	38.06	50.83	269	309	0.181	71	0.229865	65.5744
165	Myopia (+)	Myopia (+)	L	Boys	17	27.31	7	114	115	113	51.39	36.14	53.16	273	321	0.213	58	0.276957	68.984
166	Myopia (+)	Myopia (+)	P	Girls	14	23.81	7	125	125	126	53.7	31.14	56.6	227	305	0.234	74	0.231272	53.6482
167	Myopia (+)	Myopia (+)	L	Girls	14	23.19	1	127	126	128	51.09	36.47	52.1	236	195	0.156	73	0.146256	48.2031
168	Myopia (+)	Myopia (+)	L	Boys	9	23.21	0.5	122	122	121	52.45	39.4	54.87	267	315	0.109	68	0.102368	49.579
169	Myopia (+)	Myopia (+)	P	Boys	9	23.43	0.75	124	125	123	50.93	35.59	52.37	268	315	0.096	68	0.0918766	49.1376
170	Myopia (+)	Myopia (+)	L	Girls	14	24.64	6.5	131	130	132	52.09	34.16	53.92	276	332	0.101	63	0.106903	56.0423
171	Myopia (+)	Myopia (+)	P	Girls	14	23.97	5.25	130	131	128	51.14	34.54	53.14	276	331	0.146	61	0.146244	51.8368
172	Myopia (+)	Myopia (+)	L	Boys	13	23.97		116	117	116	54.64	34.14	57.58	250	322	0.212	65	0.212354	55.3845
173	Myopia (+)	Myopia (+)	P	Girls	16	23.11	1.25	129	131	127	54.36	36.34	56.38	273	341	0.162	64	0.150836	50.9051
174	Myopia (+)	Myopia (+)	L	Girls	16	23.24	0.5	127	128	125	52.6	34.7	54.85	270	343	0.207	66	0.194909	49.8603
175	Myopia (+)	Myopia (+)	P	Boys	13	23.85	1.25	132	133	131	54.13	35.64	56	243	326	0.176	66	0.174533	54.2747
176	Myopia (+)	Myopia (+)	L	Boys	13	23.65	1	133	135	130	49.79	34.43	52.09	250	334	0.173	58	0.168693	49.0207
177	Myopia (-)	Myopia (-)	L	Boys	12	22.48		132	136	129	50.72	38.32	52.4	292	336	0.082	60	0.0722429	44.727
178	Myopia (-)	Myopia (-)	P	Boys	13	23.89		137	135	139	42.87	35.27	42.99	316	340	0.043	61	0.0427848	43.1408
179	Myopia (-)	Myopia (-)	L	Boys	13	23.81		132	132	131	48.85	33.56	49.14	306	331	0.004	69	0.00395337	48.8029
180	Myopia (-)	Myopia (-)	P	Boys	12	23.52		121	123	118	49.49	29.81	51.31	257	336	0.253	58	0.243997	48.1468
181	Myopia (-)	Myopia (-)	L	Boys	12	23.49		121	121	122	47.21	26.74	48.66	240	322	0.388	60	0.373239	45.8018
182	Myopia (-)	Myopia (-)	P	Boys	13	23.8		121	119	123	55.48	29.94	57.95	239	325	0.319	76	0.315017	55.3761
183	Myopia (-)	Myopia (-)	P	Boys	18	23.33		135	134	136	51.36	31.23	53.92	277	341	0.23	69	0.218246	49.0949
184	Myopia (-)	Myopia (-)	L	Boys	18	23.3		133	132	135	52.59	29.24	54.57	281	345	0.176	64	0.166576	50.1305
185	Myopia (-)	Myopia (-)	P	Boys	12	22.14		129	128	131	52.97	30	54.77	259	345	0.273	72	0.233296	45.1864
186	Myopia (-)	Myopia (-)	L	Boys	12	22.43		129	129	129	53.04	28.06	54.93	246	327	0.29	73	0.254358	46.5468
187	Myopia (-)	Myopia (-)	P	Girls	14	23.32		133	133	132	53.31	32.48	55.71	260	329	0.236	65	0.223747	50.9115
188	Myopia (-)	Myopia (-)	L	Girls	14	23.38		130	130	131	44.27	26.89	46.29	252	312	0.215	66	0.204888	42.5145
189	Myopia (-)	Myopia (-)	P	Girls	15	22.48		128	128	129	42	29.14	42.64	283	350	0.354	46	0.311878	37.0374
190	Myopia (-)	Myopia (-)	L	Girls	15	22.64		130	129	130	50.49	35.85	52.59	282	343	0.205	72	0.183187	45.2165
193	Myopia (-)	Myopia (-)	L	Boys	15	23.8		123	123	123	51.49	30.26	54.99	249	318	0.244	75	0.240953	51.3935
194	Myopia (-)	Myopia (-)	L	Girls	12	22.82		130	131	130	53.26	36.66	54.68	249	321	0.208	78	0.188835	48.5255
195	Myopia (-)	Myopia (-)	P	Girls	9	22.27		114	116	112	51.91	28.62	53.82	235	329	0.314	63	0.271493	44.8506
196	Myopia (-)	Myopia (-)	L	Girls	9	22.17		114	115	113	55.27	30.96	56.67	233	315	0.311	81	0.26649	47.2877
197	Myopia (-)	Myopia (-)	P	Boys	13	23.99		136	135	138	52.59	34.7	54.2	239	312	0.205	71	0.205685	53.4029
198	Myopia (-)	Myopia (-)	L	Boys	13	23.45		136	135	136	52.69	32.36	55.39	236	311	0.238	70	0.228166	50.9298
199	Myopia (-)	Myopia (-)	P	Boys	14	22.99		131	129	132	54.26	22.9	57.59	236	317	0.357	77	0.328954	50.2403
200	Myopia (-)	Myopia (-)	L	Boys	14	22.53		131	129	132	50.57	25.26	53.84	235	325	0.386	68	0.341585	44.8109
201	Myopia (-)	Myopia (-)	P	Boys	16	23.02		112	110	115	54.43	35.73	56.39	253	294	0.157	78	0.145044	50.5406
202	Myopia (-)	Myopia (-)	L	Boys	16	22.7		112	111	113	48.51	33.39	50.45	260	307	0.182	64	0.163498	43.6941
203	Myopia (-)	Myopia (-)	P	Girls	14	22.03		124	121	127	52.69	38.93	54.59	274	322	0.185	77	0.156527	44.4622
204	Myopia (-)	Myopia (-)	P	Girls	16	23.08		131	130	133	53.34	26.17	56.5	273	348	0.351	69	0.325963	49.8092
205	Myopia (-)	Myopia (-)	P	Boys	17	24.13		118	118	119	53.29	35.63	55.22	258	311	0.198	74	0.200987	54.7993
206	Myopia (-)	Myopia (-)	P	Girls	11	22.62		136	135	136	53.85	28.12	56.8	254	337	0.3	59	0.267606	48.133
207	Myopia (-)	Myopia (-)	L	Girls	11	22.28		135	135	136	53.08	28.96	55.56	247	324	0.277	71	0.239717	45.9063
208	Myopia (-)	Myopia (-)	P	Boys	11	23.17		120	120	120	53.77	27.59	56.78	229	312	0.331	73	0.309791	50.6368
209	Myopia (-)	Myopia (-)	L	Boys	11	22.99		121	120	121	52.05	28.98	54.16	230	314	0.275	67	0.253396	48.194
210	Myopia (-)	Myopia (-)	L	Girls	9	22.08		120	121	119	55.31	32.51	57.95	235	308	0.282	72	0.239682	46.9043
213	Myopia (-)	Myopia (-)	L	Girls	10	22.41		112	111	113	50.77	31.06	53.23	246	308	0.303	65	0.265287	44.4683
214	Myopia (-)	Myopia (-)	P	Girls	10	22.26		115	114	116	53.23	32.31	54.98	244	302	0.281	67	0.242742	45.9461
215	Myopia (-)	Myopia (-)	L	Boys	13	23.99		136	135	136	52.69	32.36	55.39	236	311	0.238	70	0.238796	53.5044
216	Myopia (-)	Myopia (-)	P	Boys	13	23.45		136	135	138	52.59	34.7	54.2	239	312	0.205	71	0.19653	50.8331
219	Myopia (-)	Myopia (-)	P	Boys	12	23.46		111	111	111	55.23	24.46	58.44	213	294	0.422	76	0.404909	53.4343
220	Myopia (-)	Myopia (-)	L	Boys	12	23.49		112	110	114	52.26	22	55.95	222	305	0.464	69	0.446347	50.7011
221	Myopia (-)	Myopia (-)	P	Boys	15	23.56		128	128	128	51.25	32.4	52.35	261	321	0.175	66	0.169347	50.043
222	Myopia (-)	Myopia (-)	P	Boys	9	23.13		118	117	119	47.19	26.91	49.18	262	310	0.244	60	0.227578	44.2738
223	Myopia (-)	Myopia (-)	P	Boys	10	23.46		118	118	118	56.48	40.03	58.51	257	317	0.158	61	0.151601	54.6436
224	Myopia (-)	Myopia (-)	P	Boys	14	23.32		120	119	122	52.25	32	54.96	244	318	0.239	67	0.226592	49.8992
225	Myopia (-)	Myopia (-)	L	Girls	16	22.9		116	116	115	51.82	29.98	54.83	245	308	0.254	69	0.232217	47.5739
226	Myopia (-)	Myopia (-)	P	Girls	16	22.59		119	119	119	52.69	30.52	55.14	243	313	0.24	71	0.213517	46.9604
227	Myopia (-)	Myopia (-)	L	Girls	16	22.27		119	119	120	53.11	32.84	55.92	242	308	0.233	69	0.201458	45.8874
228	Myopia (-)	Myopia (-)	P	Girls	10	23.35		127	127	127	54.29	33.45	56.64	244	323	0.236	77	0.224323	51.9922
229	Myopia (-)	Myopia (-)	L	Girls	10	22.66		127	125	128	54.16	32.52	56.4	246	324	0.257	74	0.23006	48.5964
230	Myopia (-)	Myopia (-)	P	Girls	9	22.55		134	135	134	56.65	33.37	58.89	244	331	0.304	81	0.269498	50.2955
231	Myopia (-)	Myopia (-)	L	Girls	9	22.62		133	135	131	54.17	30.02	56.76	243	331	0.313	74	0.279202	48.419
232	Myopia (-)	Myopia (-)	P	Girls	13	22.95		133	132	134	52.34	29.3	55.79	226	322	0.279	71	0.256188	48.2795
233	Myopia (-)	Myopia (-)	L	Girls	13	22.93		133	133	134	54.47	27.74	56.82	225	320	0.28	82	0.256658	50.1492
234	Myopia (-)	Myopia (-)	P	Boys	15	23.6		129	128	131	54.35	25.91	57.23	238	338	0.415	62	0.402959	53.2655
235	Myopia (-)	Myopia (-)	P	Boys	10	22.97		107	108	105	49.45	34.91	51.14	234	284	0.243	67	0.22352	45.7001
236	Myopia (-)	Myopia (-)	P	Girls	15	23.34		126	126	125	56.68	29.94	58.98	242	325	0.301	82	0.285862	54.2306
237	Myopia (-)	Myopia (-)	L	Girls	15	23		124	125	122	55.16	28.8	57.84	234	319	0.344	77	0.317251	51.1218
238	Myopia (-)	Myopia (-)	P	Boys	14	24.03		135	136	133	56.68	37.33	59.06	285	328	0.103	79	0.103689	57.764
239	Myopia (-)	Myopia (-)	L	Boys	14	24.14		136	137	135	55.46	40.22	56.3	294	338	0.084	75	0.0853381	57.0819
240	Myopia (-)	Myopia (-)	P	Girls	17	21.92		111	112	110	52.22	32.02	54.74	234	295	0.256	70	0.214442	43.5872
241	Myopia (-)	Myopia (-)	L	Girls	17	21.72		107	107	107	49.97	30.65	51.83	233	296	0.318	65	0.261539	40.8833
243	Myopia (-)	Myopia (-)	P	Girls	16	22.4		129	130	129	51.97	26.29	54.41	236	330	0.347	65	0.303539	45.4751
244	Myopia (-)	Myopia (-)	P	Boys	12	22.48		112	109	115	51.42	24.14	53.66	221	314	0.316	73	0.2784	45.3443
247	Myopia (-)	Myopia (-)	P	Boys	12	23.6		129	127	130	55.4	38.7	57.48	264	328	0.168	76	0.163126	54.2945
248	Myopia (-)	Myopia (-)	L	Boys	12	23.66		127	125	129	54.53	36.32	56.98	280	346	0.189	63	0.184451	53.7367
249	Myopia (-)	Myopia (-)	P	Boys	11	22.3		128	127	129	50.73	37.8	51.82	280	326	0.113	66	0.0979664	43.9597
250	Myopia (-)	Myopia (-)	L	Boys	11	22.71		129	129	128	51.78	36	53.78	282	331	0.077	62	0.0692331	46.6841
251	Myopia (-)	Myopia (-)	P	Boys	12	23.34		115	114	115	54.56	36.26	57	238	303	0.235	76	0.223182	52.2022
252	Myopia (-)	Myopia (-)	P	Girls	15	22.28		119	118	120	56.08	27.22	58.71	239	322	0.374	69	0.323661	48.5009
253	Myopia (-)	Myopia (-)	L	Girls	15	22.53		120	119	121	53.94	26.03	56.98	231	317	0.387	73	0.34247	47.7971
254	Myopia (-)	Myopia (-)	L	Girls	10	22.16		131	132	130	54.75	36.84	56.04	248	311	0.153	71	0.130985	46.7968
255	Myopia (-)	Myopia (-)	P	Girls	10	22.25		127	130	125	56.4	34.49	58.1	238	307	0.204	76	0.176067	48.6347
256	Myopia (-)	Myopia (-)	P	Boys	17	22.71		114	113	115	49.39	28.9	51.58	247	315	0.258	72	0.231976	44.5293
257	Myopia (-)	Myopia (-)	L	Boys	17	22.37		116	114	117	50.6	25.62	52.66	246	316	0.287	75	0.250382	44.1473
258	Myopia (-)	Myopia (-)	P	Boys	17	23.27		123	123	122	52.15	26.63	55.69	234	315	0.314	71	0.296423	49.5723
259	Myopia (-)	Myopia (-)	L	Boys	9	23.08		108	107	110	53.21	38.29	54.72	257	305	0.16	58	0.148587	49.6878
260	Myopia (-)	Myopia (-)	P	Girls	13	22.33		135	132	138	56.26	36.78	58.54	272	338	0.157	86	0.136479	48.8947
261	Myopia (-)	Myopia (-)	L	Girls	13	22.08		135	134	136	52.56	37.3	53.48	271	334	0.167	72	0.14194	44.5723
262	Myopia (-)	Myopia (-)	P	Boys	16	22.19		123	124	122	51.23	25.03	53.88	228	324	0.332	78	0.284998	43.9174
263	Myopia (-)	Myopia (-)	L	Boys	16	22.43		122	123	121	52.45	23.4	54.84	222	316	0.341	84	0.29909	46.029
264	Myopia (-)	Myopia (-)	P	Girls	14	21.49		123	121	125	47.13	23.36	49.27	238	336	0.331	54	0.266495	37.6735
265	Myopia (-)	Myopia (-)	L	Girls	14	21.58		121	120	122	53.05	27.28	55.48	219	316	0.344	80	0.279287	42.7947
266	Myopia (-)	Myopia (-)	P	Girls	16	21.94		126	127	124	47.8	30	49.5	277	339	0.256	62	0.214834	39.9774
267	Myopia (-)	Myopia (-)	L	Girls	16	21.75		125	124	125	49.46	32.75	51.92	274	334	0.285	65	0.235046	40.5881
268	Myopia (-)	Myopia (-)	P	Boys	15	23.64		127	126	128	53.07	34.3	55.19	261	323	0.208	69	0.20265	52.2022
269	Myopia (-)	Myopia (-)	L	Boys	15	23.31		128	128	128	48.08	32.56	50.4	261	321	0.207	73	0.196085	45.8741
270	Myopia (-)	Myopia (-)	P	Boys	10	23.1		123	123	122	50.16	29.42	51.99	245	313	0.246	72	0.228848	46.9279
271	Myopia (-)	Myopia (-)	L	Boys	10	23.4		118	120	116	49.56	30.44	51.1	248	319	0.273	61	0.260605	47.6831
272	Myopia (-)	Myopia (-)	P	Boys	10	23.9		134	134	135	50.94	29.41	52.67	263	333	0.195	61	0.194187	51.3083
273	Myopia (-)	Myopia (-)	L	Boys	10	23.6		135	134	137	52.09	29.36	54.99	261	337	0.205	68	0.199052	51.0505
274	Myopia (-)	Myopia (-)	P	Boys	14	22.6		126	122	130	51.42	38.94	52.86	284	337	0.127	72	0.113086	45.8726
275	Myopia (-)	Myopia (-)	L	Girls	12	21.46		123	118	129	53.9	38.44	55.19	221	296	0.174	70	0.1397	42.9538
276	Myopia (-)	Myopia (-)	P	Girls	13	22.88		118	118	118	52.33	32.92	54.77	239	305	0.258	68	0.235462	47.951
277	Myopia (-)	Myopia (-)	L	Girls	13	22.75		118	118	117	51.35	35.72	52.55	241	299	0.263	62	0.237305	46.4739
280	Myopia (-)	Myopia (-)	P	Girls	15	22.1		122	122	121	55.65	33.68	57.99	263	338	0.268	66	0.228196	47.2859
281	Myopia (-)	Myopia (-)	L	Girls	15	22.9		120	120	120	54.57	33.77	56.85	255	315	0.263	76	0.240445	50.0986
282	Myopia (-)	Myopia (-)	P	Girls	12	22.98		122	122	122	52.31	33.67	54.35	264	336	0.197	65	0.181366	48.389
283	Myopia (-)	Myopia (-)	L	Girls	12	22.87		120	119	121	52.31	36.58	53.94	263	332	0.146	65	0.133129	47.8872
284	Myopia (-)	Myopia (-)	P	Girls	14	23.24		130	131	130	55.77	35.53	57.8	252	322	0.158	86	0.148771	52.8652
285	Myopia (-)	Myopia (-)	L	Girls	14	22.66		130	130	129	55.59	34.89	57.62	251	323	0.164	82	0.146809	49.8795
286	Myopia (-)	Myopia (-)	P	Girls	12	23.26		122	120	124	53.54	34.66	55.85	265	325	0.211	60	0.199017	50.8462
287	Myopia (-)	Myopia (-)	L	Girls	12	23.61		122	122	122	54.76	38.12	56.3	263	318	0.157	75	0.152574	53.7166
288	Myopia (-)	Myopia (-)	L	Girls		21.55		126	122	128	49.48	24.61	51.48	229	320	0.369	67	0.298751	39.7937
